# Supplementary material for: Selective activation and expansion of regulatory T cells using lipid encapsulated mRNA encoding a long-acting IL-2 mutein
Source: Nat Commun. 2022 Jul 5;13:3866. doi: 10.1038/s41467-022-31130-9 (PMC9256694; doi:10.1038/s41467-022-31130-9)
Supplement: Supplementary file 1 — Supplementary Information [file 41467_2022_31130_MOESM1_ESM.pdf]

## **Supplementary Information**

**Selective activation and expansion of regulatory T cells using lipid encapsulated mRNA  
encoding a long-acting IL-2 mutein.**

Seymour de Picciotto<sup>1,\*</sup>, Nicholas DeVita<sup>1</sup>, Chiaowen Joyce Hsiao<sup>1</sup>, Christopher Honan<sup>1</sup>, Sze-Wah Tse<sup>1</sup>, Mychael Nguyen<sup>1</sup>, Joseph D. Ferrari<sup>1</sup>, Wei Zheng<sup>1</sup>, Brian T. Wipke<sup>1</sup>, Eric Huang<sup>1,\*</sup>

<sup>1</sup>Moderna, Inc., Cambridge, MA, 02139, USA

## 1. Supplementary Figures

### Supplementary Figure 1:

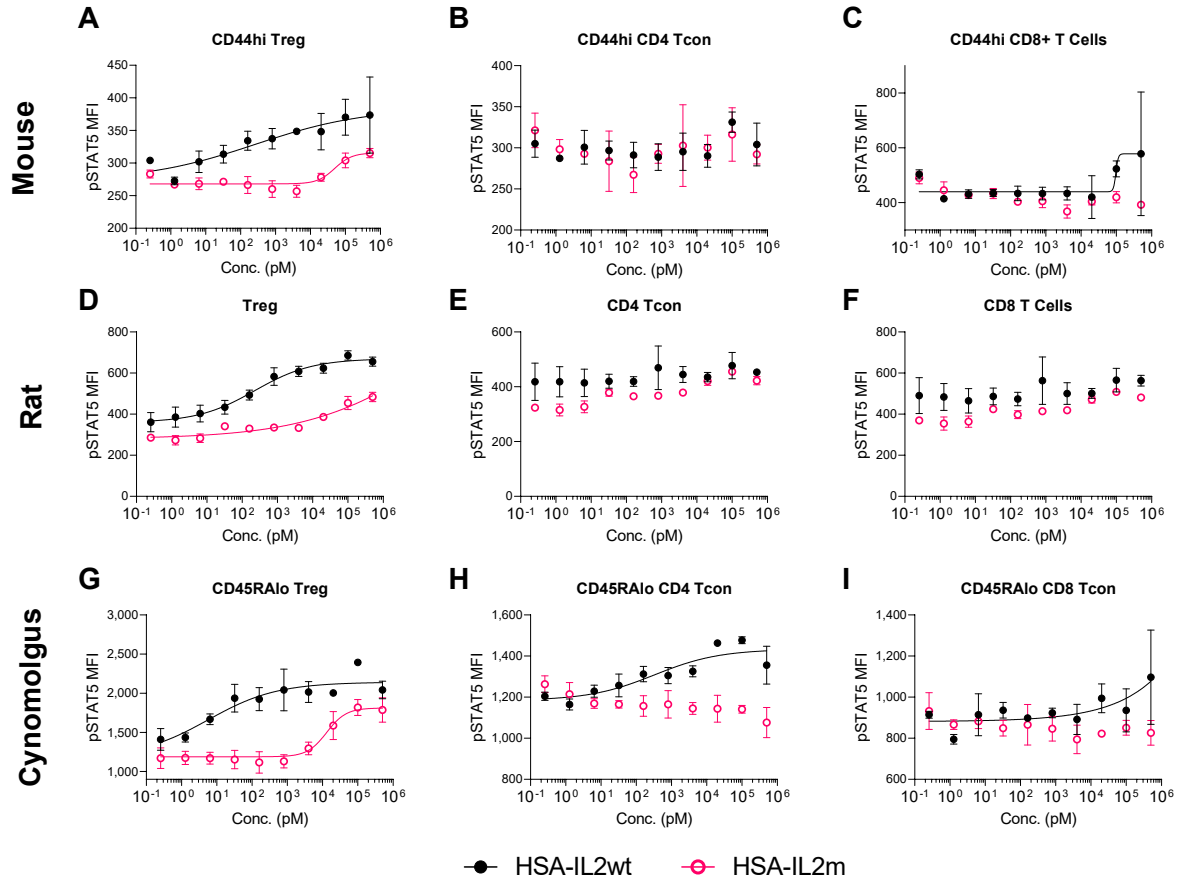

***In vitro* characterization on mouse, rat and cynomolgus monkey T cells of HSA-IL2wt and HSA-IL2m induced STAT5 phosphorylation.** HSA-IL2wt and HSA-IL2m protein titrations on murine **A)** memory Tregs, **B)** memory CD4+ conventional T cells, and **C)** memory CD8+ T cells after 30-minute incubation. HSA-IL2wt and HSA-IL2m titrations on rat **D)** memory Tregs, **E)** memory CD4+ conventional T cells, and **F)** memory CD8+ T cells after 30-minute incubation. HSA-IL2wt and HSA-IL2m titrations on cynomolgus monkey **G)** memory Tregs, **H)** memory CD4+ conventional T cells, and **I)** memory CD8+ T cells after 30-minute incubation. Data are presented as mean  $\pm$  s.d, fits are derived from log-logistic model, n=4.

## Supplementary Figure 2:

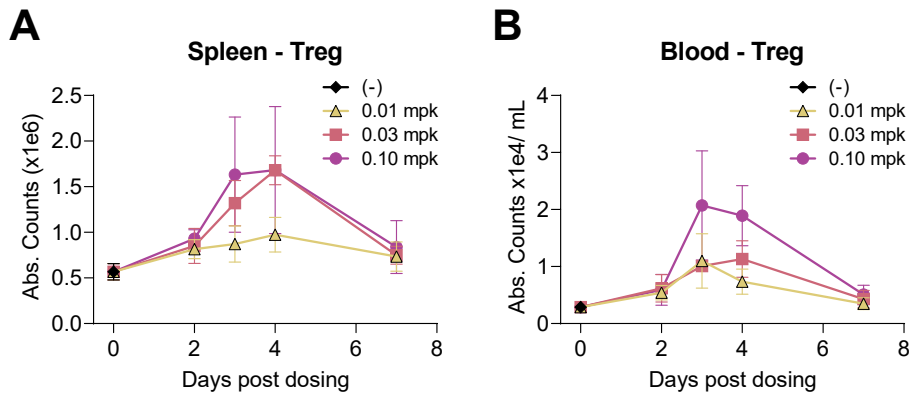

Kinetics of Treg expansion in C57BL/6 with *HSA-IL2wt*. Murine Treg counts were determined in the A) spleen and B) blood following subcutaneous administration of *HSA-IL2wt* at 0.01, 0.03 and 0.1 mpk (n=6). Data shown as mean  $\pm$  s.d.

### Supplementary Figure 3:

**A**

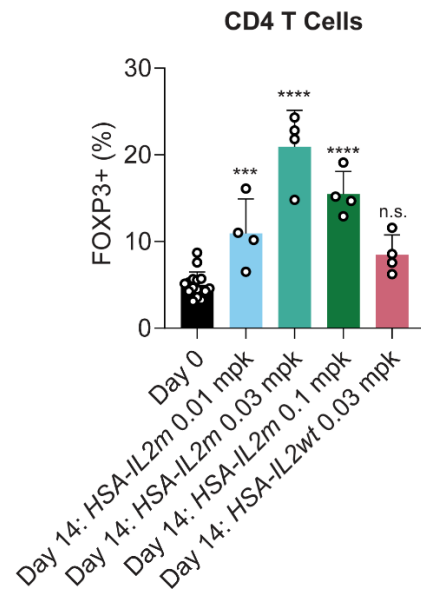

**B**

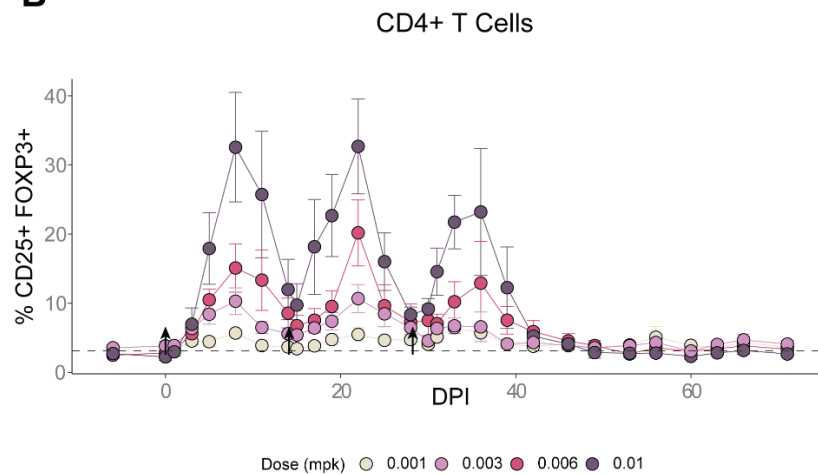

Kinetics of Treg expansion with *HSA-IL2wt* and *HSA-IL2m* in cynomolgus monkey. (A)

Frequency of Treg populations in cynomolgus blood as a function of *HSA-IL2m* or *HSA-IL2wt*

dose. Data presented as mean  $\pm$  s.d, n = 16 for Day 0, n = 4 for all others. Asterisks denote

significance (One-way ANOVA, p-value \*\*\* < 0.001, \*\*\*\* < 1e-4; n.s. = not significant) compared

to baseline (Day 0). Exact P-values, from left to right: P = 9e-4, < 1e-4, < 1e-4, 7.24e-2. (B)

Frequency of Tregs among CD4 T cells in cynomolgus monkey following repeat administration

of *HSA-IL2m*. Arrows indicate time on injection. Data are presented as mean  $\pm$  s.e, n = 4.

Abbreviations: DPI = Days Post first Injection.

**Supplementary Figure 4:**

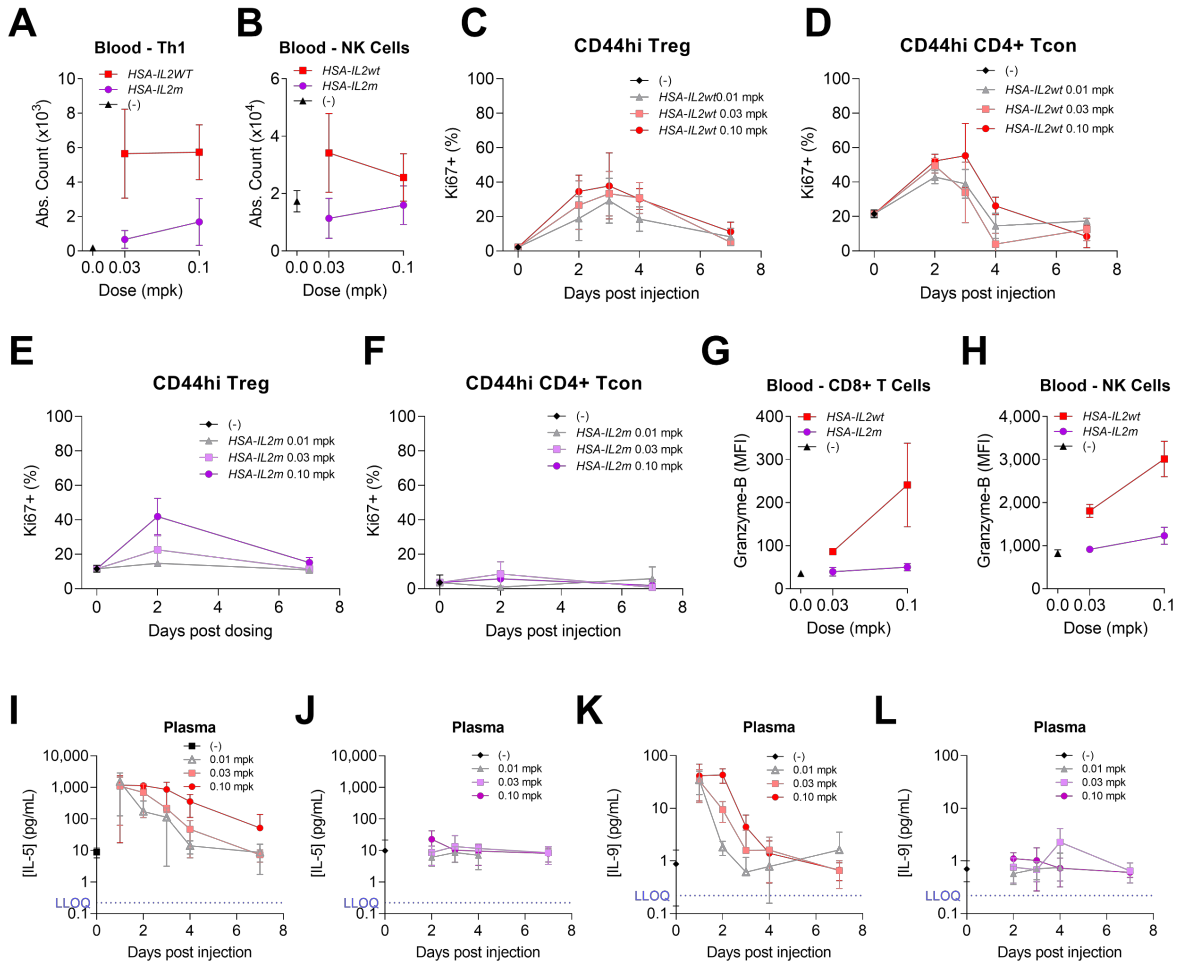

**In vivo enhanced selectivity of HSA-IL2m towards regulatory T cells in mice.** *HSA-IL2wt* expands proinflammatory A) Th1 cells and B) NK cells in blood (n = 5). Frequency of Ki67 positive C) regulatory T cells and D) conventional CD4 T cells after *HSA-IL2wt* treatment (n = 6). Frequency of Ki67 positive E) regulatory T cells and F) conventional CD4 T cells after *HSA-IL2m* treatment (n=6). *HSA-IL2wt* activates G) CD8 T cells and H) NK cells as shown by upregulation of GZMB (n = 5). Plasma concentration of IL-5 after administration of I) *HSA-IL2wt* or J) *HSA-IL2m* (n = 6). Plasma concentration of IL-9 after administration of K) *HSA-IL2wt* or L) *HSA-IL2m* (n = 6). Data are presented as mean  $\pm$  s.d.

Supplementary Figure 5:

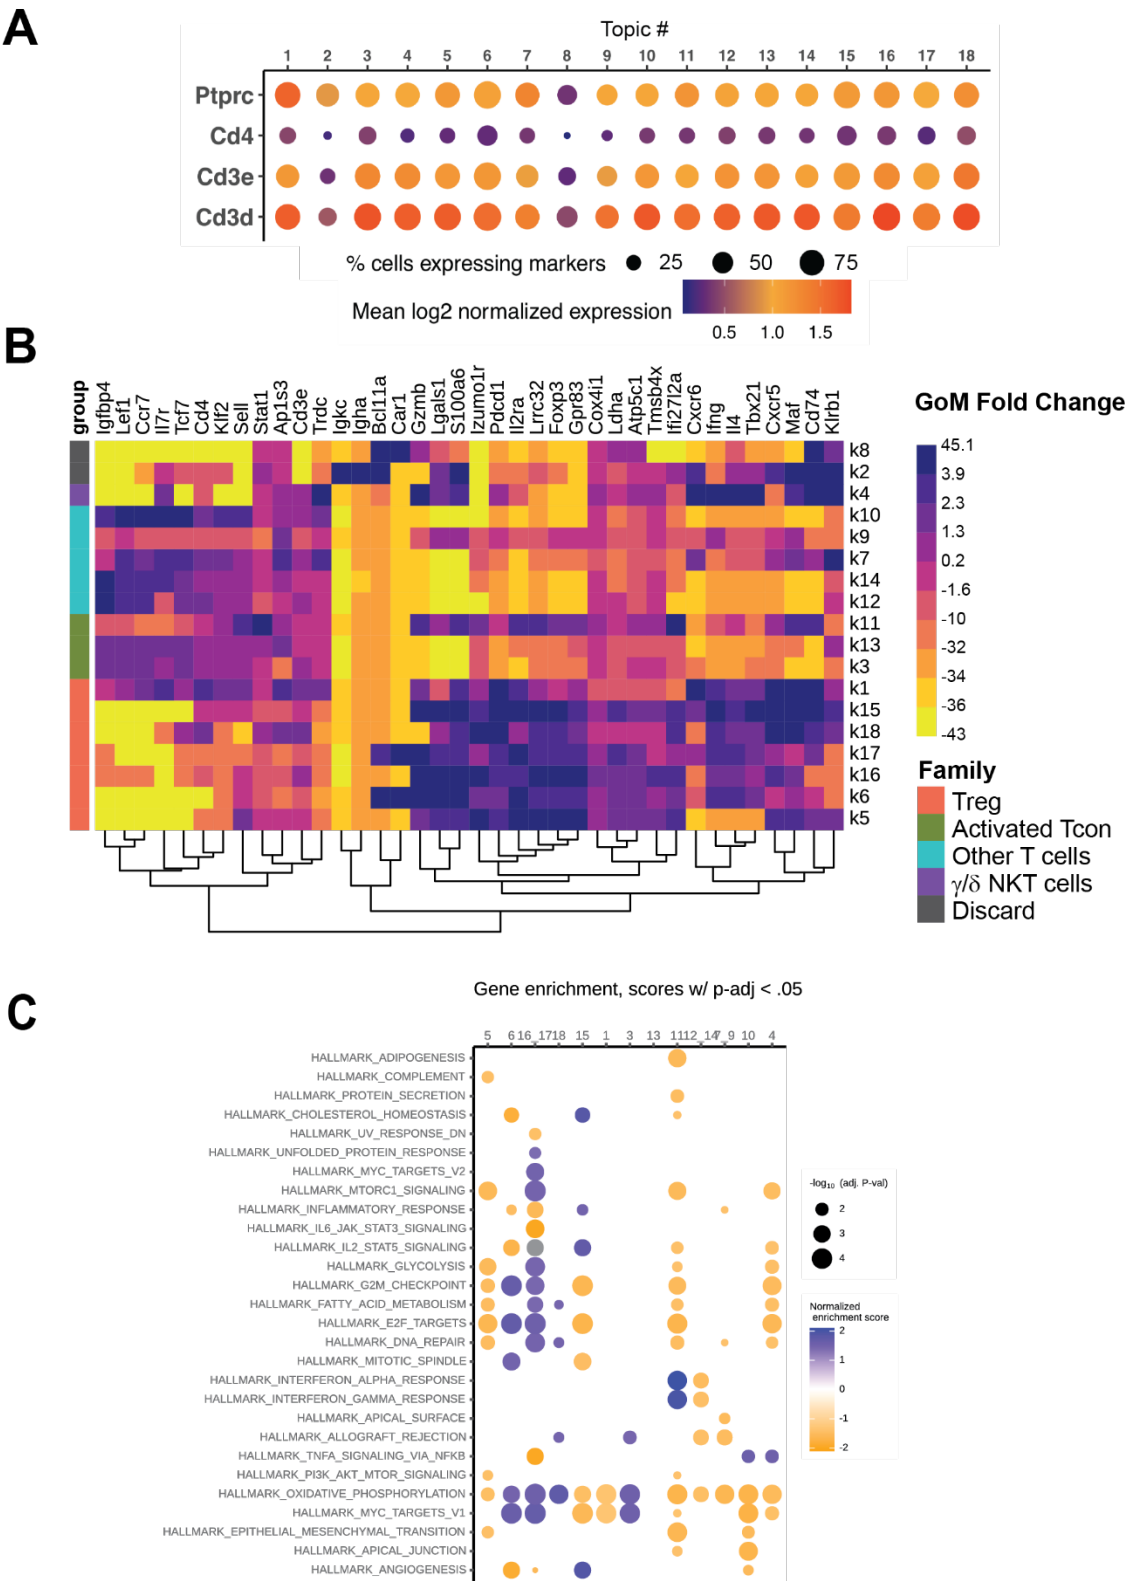

**Characterization of CD4 T cells by scRNA-seq.** Topic modeling of scRNA-seq data across treatment conditions results in 18 topics. (A) Expression profile of canonical CD4 T cell genes in each topic, according to mean log<sub>2</sub> normalization gene expression (color) and the frequency of cells expressing each marker (UMI > 0). (B) Topic-defining genes and CD4 T cell family annotation corresponding to each topic (left bar). Color corresponds to log<sub>2</sub>-fold-change of the selected topic-defining genes (mean gene expression for all cells assigned to topic k vs all other topics weighted by membership weights). (C) Gene set enrichment analysis using MSigDB Hallmark collection gene sets at false discovery rate < .05. The input to enrichment analysis was based on pairwise cluster comparisons (Welch's *t*-test k). For each topic k, the input log<sub>2</sub>-fold-change was defined as the minimal log<sub>2</sub>-fold-change across all pairwise comparisons. Dot color indicates normalized enrichment score. Dot size indicates -log<sub>10</sub> P-value adjusted for false discovery rate.

## Supplementary Figure 6:

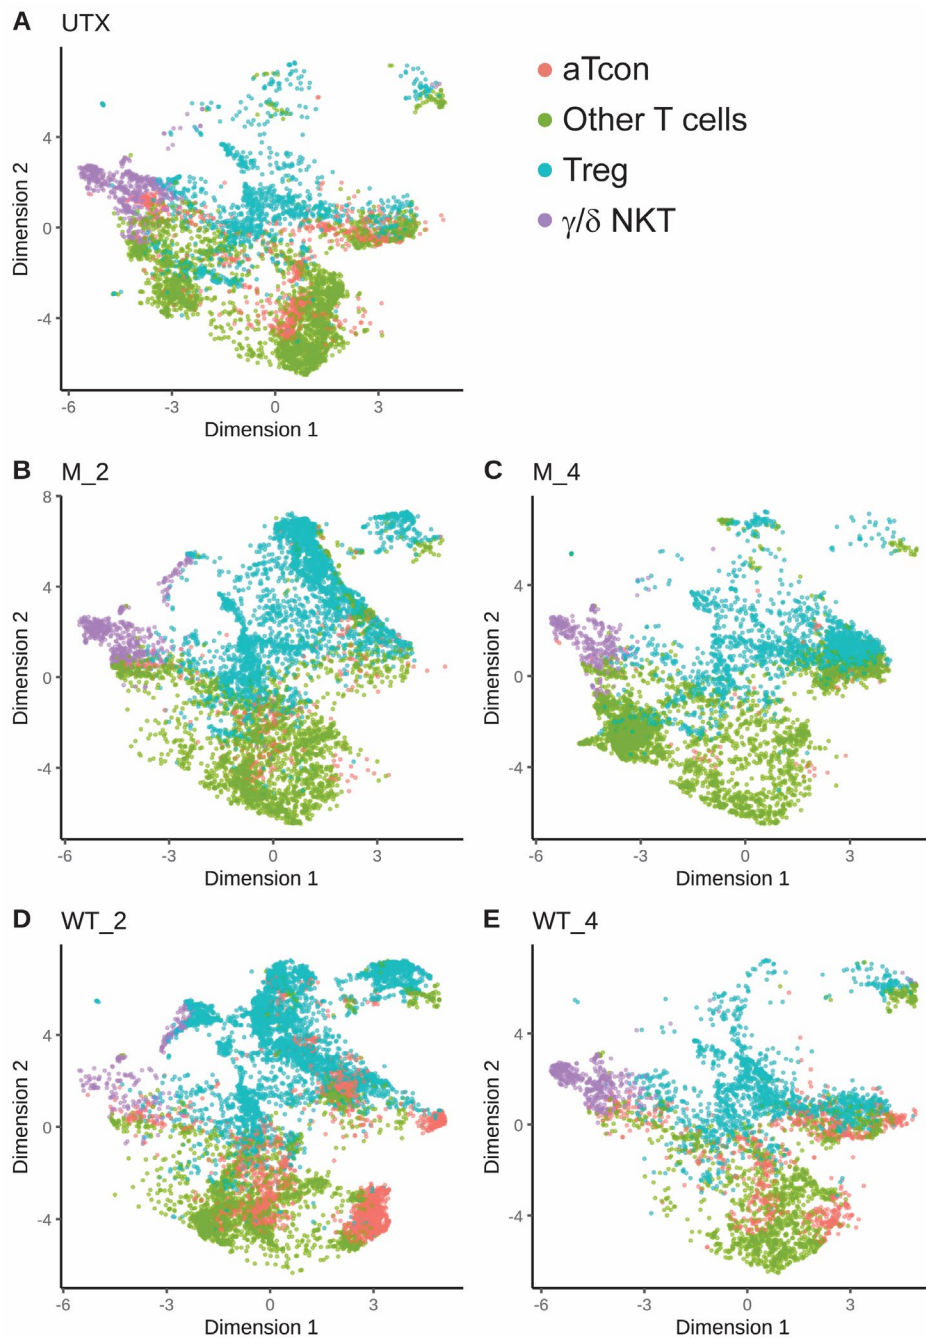

**CD4 T cell characterization by treatment condition.** UMAP embedding of scRNA-seq profiles (dots) for each treatment condition (A-E), with profiles colored by cell type family (orange: Activated T cells, green: Other T cells, blue: T regulatory cells, purple:  $\gamma/\delta$  NKT cells).

Supplementary Figure 7

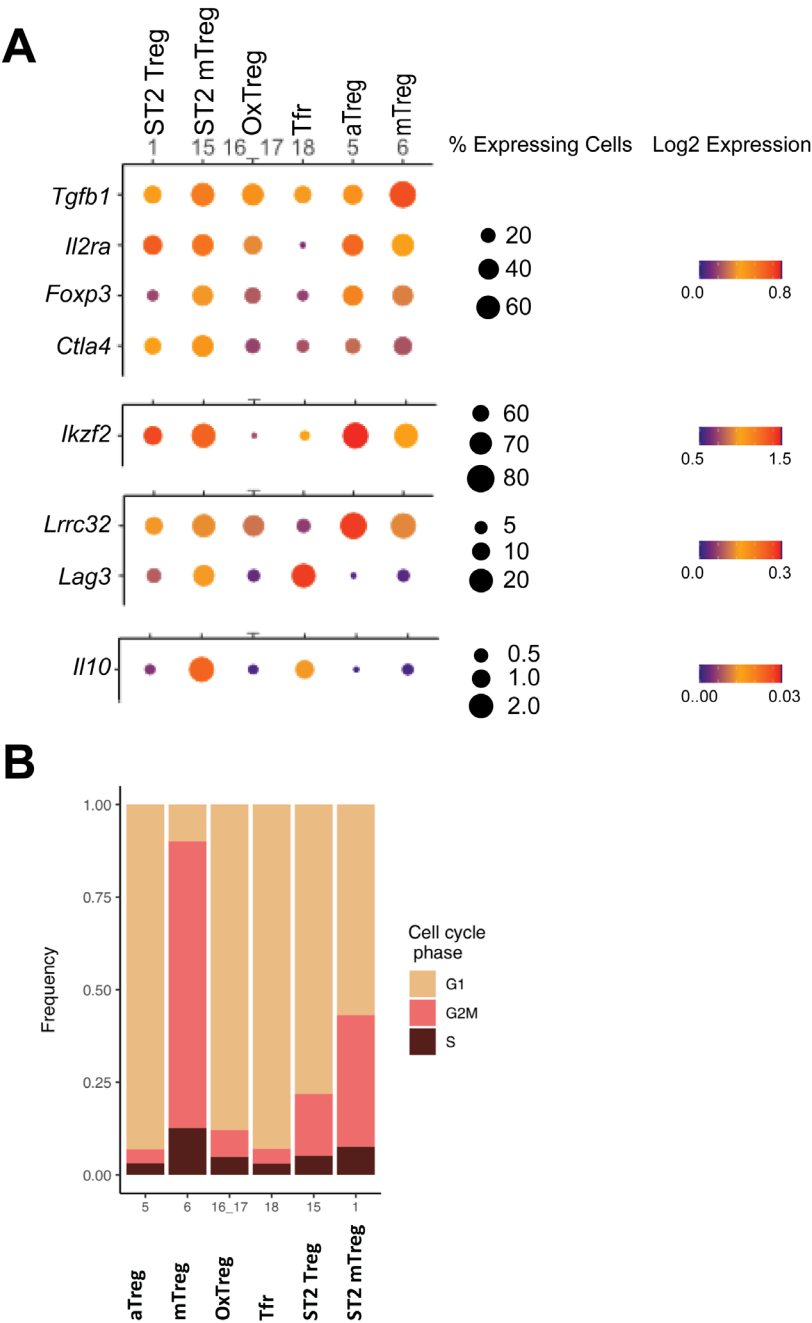

**Characterization of regulatory T cells subsets identified by scRNA-seq.** (A) Expression profile of canonical Treg genes in each topic, according to mean log2 normalization gene expression (color) and the frequency of cells expressing each marker (UMI > 0). (B) Frequency of cells assigned to a given cell cycle stage by Cyclone.

Supplementary Figure 8

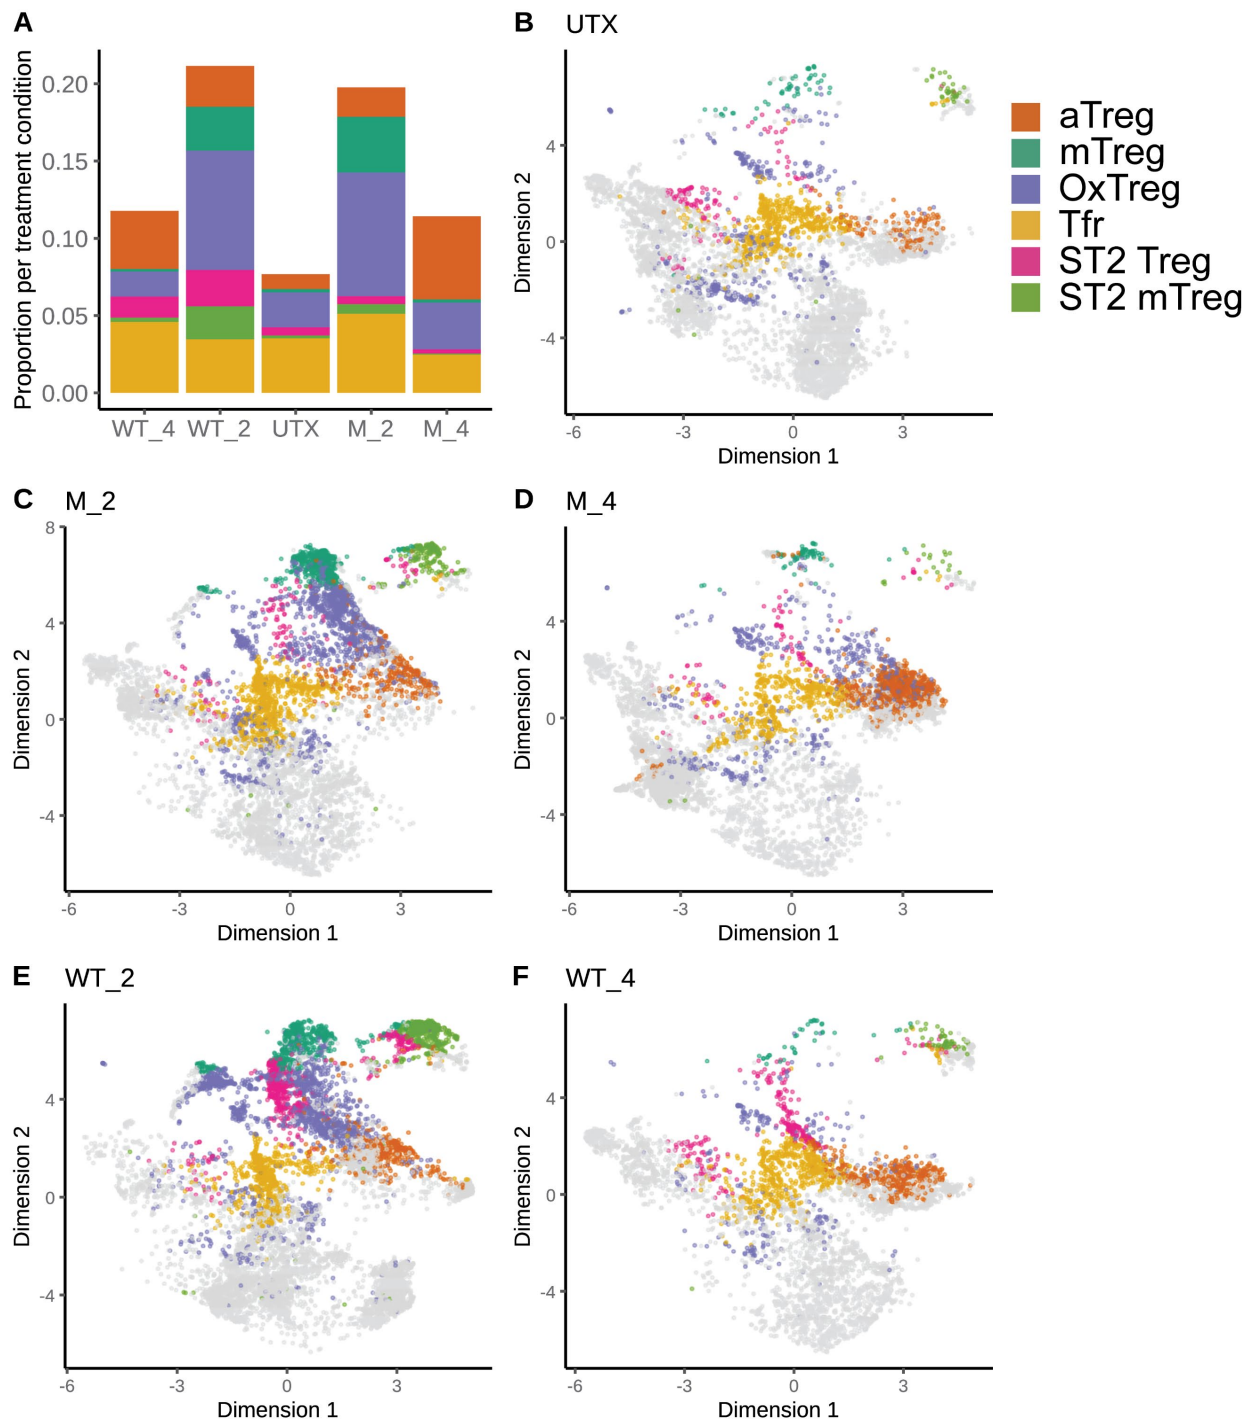



among total Tregs. D) Frequency of CD25<sup>hi</sup> GARP<sup>+</sup> (aTreg) cells among total Tregs. E) Frequency of ST2<sup>+</sup> ITGB1<sup>+</sup> KLRG1<sup>+</sup> (ST2 Treg) cells among total Tregs. F) Frequency of Ki67<sup>+</sup> cells among Tfr cells. G) Frequency of Ki67<sup>+</sup> cells among aTreg cells. H) Frequency of Ki67<sup>+</sup> among ST2 Treg cells. For B-H), data is shown as mean +/- standard deviation for n= 5 animals per group.

Cells were stained with biotinylated CXCR5 (1:100) for 15 minutes at 37C. After washing, surface staining was performed for 60 minutes with Fc block (1:100), Live Dead BLUE (1:100), CD3 AF488 (1:400), CD4 BV510 (1:1600), CD8a BV570 (1:400), NK1.1 APC (1:800), CD25 BV421 (1:400), KLRG1 BUV737 (1:400), Streptavidin BB515 (1:200), ST2 BV605 (1:100), ITGB1 AF700 (1:200), Lrrc32/GARP PE/Cy7 (1:100). After fixation cells were incubated overnight with FOXP3 AF647 (1:800), Ki67 AF532 (1:1600), BCL6 PE (1:200). Samples were acquired on a Cytex Aurora flow cytometer.

## Supplementary Figure 10

**A**

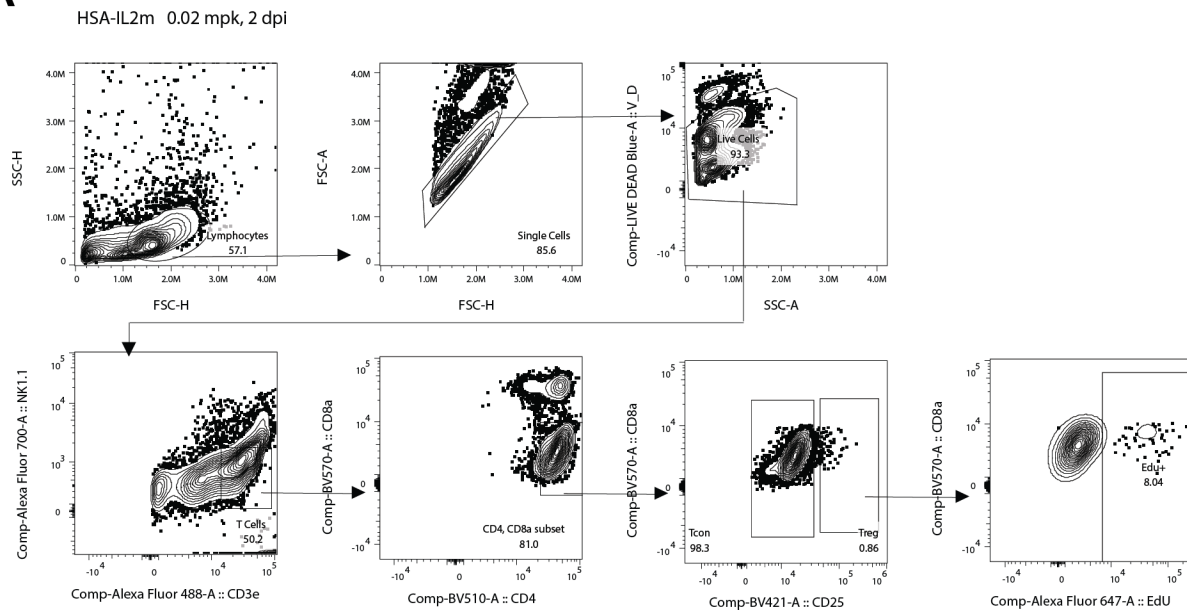

**B**

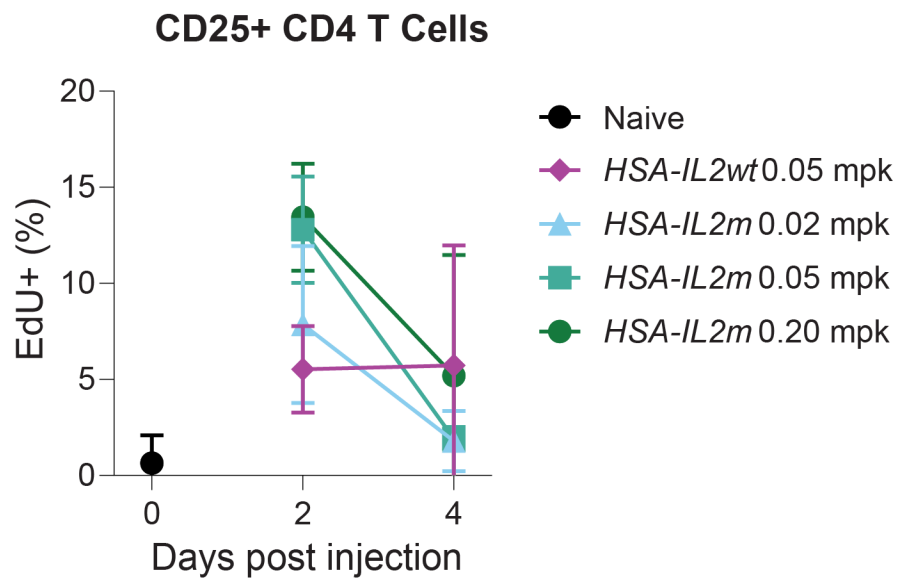

**Treg proliferation assay.** Splenocytes were incubated 1h *ex vivo* with a thymidine analog compatible for click chemistry (alkyne). Treg cells were stained with viability dye, CD3e, CD4, CD8 and CD25 antibodies and azide Alexa 647. A) Gating strategy is shown on a sample from two days post injection with 0.02 mpk *HSA-IL2m*. B) Quantification of EdU positive CD25+ CD4 T Cells. Data is shown as mean $\pm$  standard deviation for n = 5.

## Supplementary Figure 11

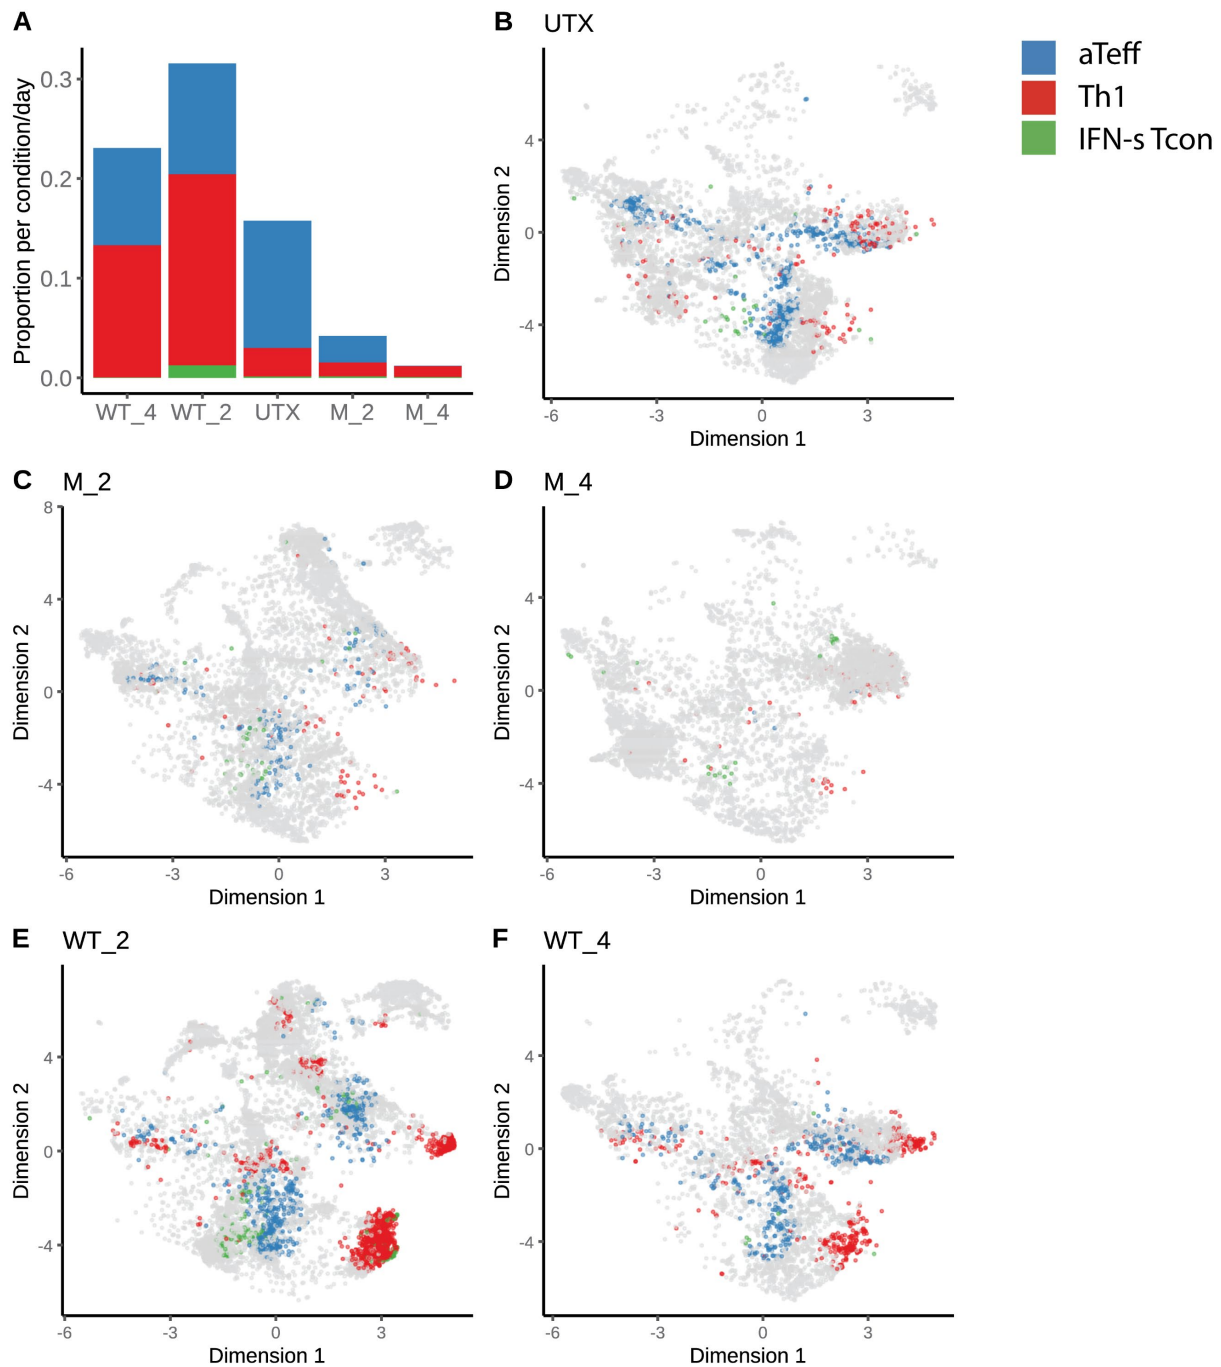

**Characterization of activated Tcon topics by treatment condition.** (A) Frequency of activated Tcon topics by treatment condition. (B-F) UMAP embedding of scRNA-seq profiles (dots) for each treatment condition, with profiles colored by activated Tcon subtypes.

## Supplementary Figure 12

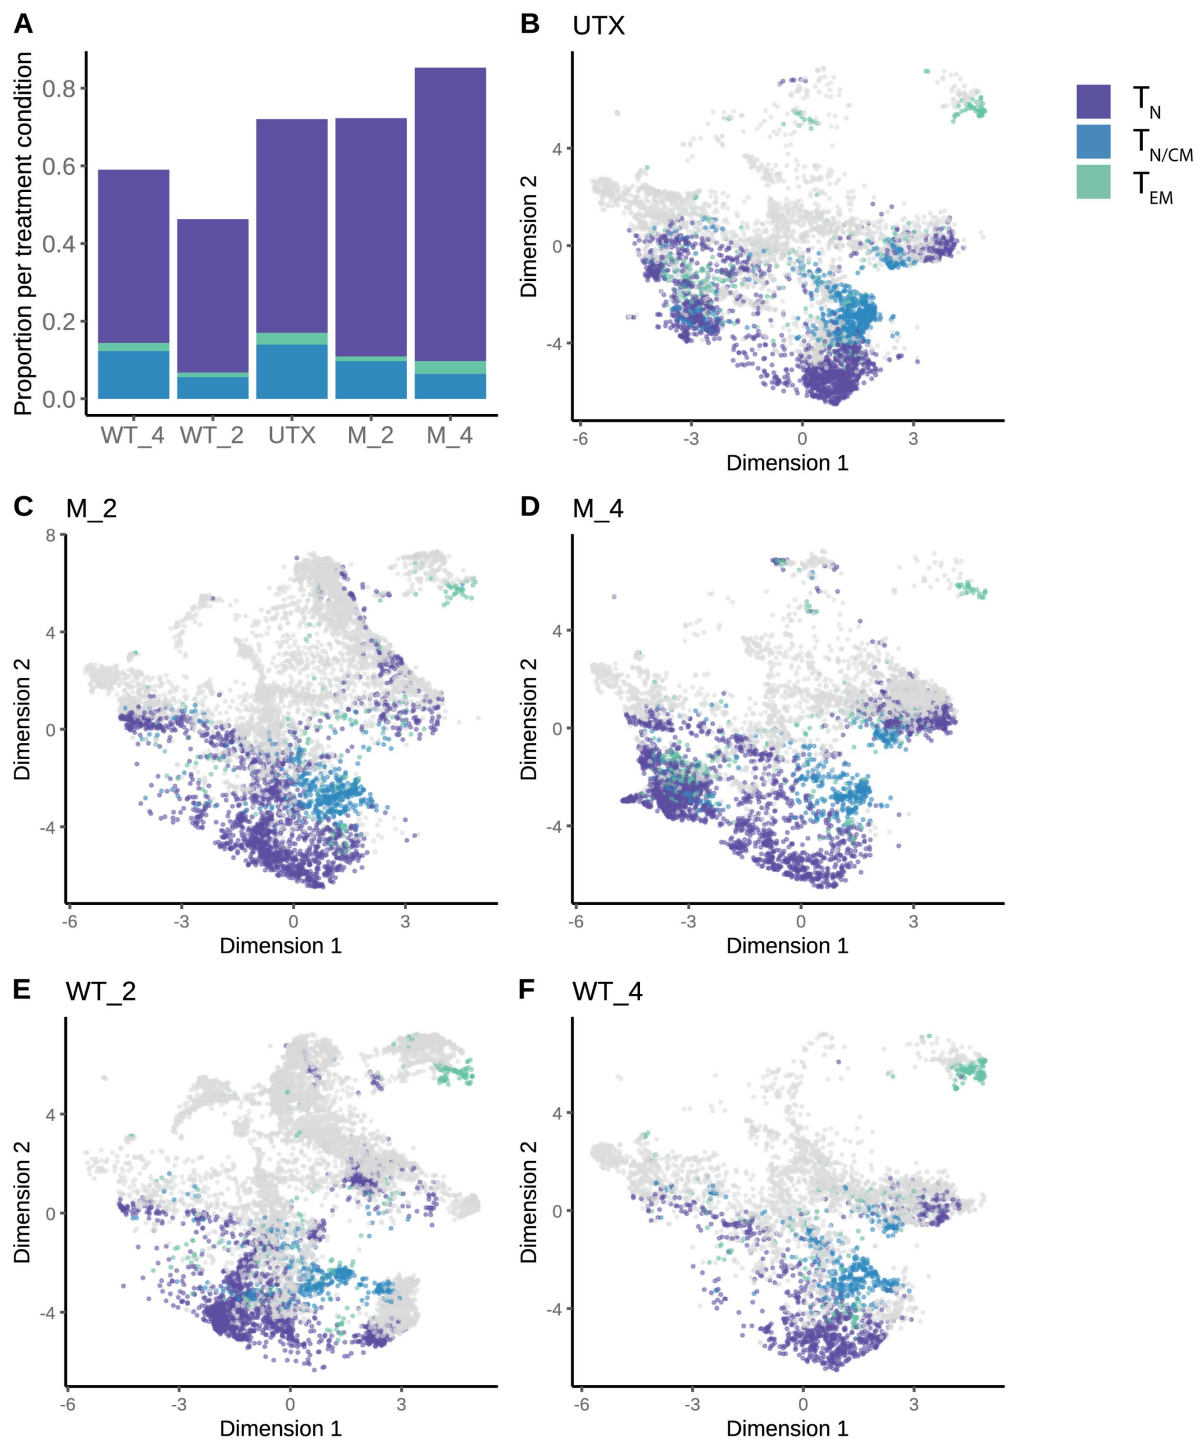

**Characterization of other Tcon topics by treatment condition.** (A) Frequency of other Tcon topics by treatment condition. (B-F) UMAP embedding of scRNA-seq profiles (dots) for each

treatment condition (B-F), with profiles colored by other Tcon subtypes. Topic 7/9, was characterized by differentially expressed genes involved in cell cycle control (*Cdkn1b*) and fatty acid metabolism (*Acot2*). Given higher *Cd44* and lower *Sell* expression than its counterpart conventional T cell topics, we assigned this topic to effector memory T cells ( $T_{EM}$ ). Topic 10 was characterized by high expression of *il7r* and *ccr7* which are normally expressed in naïve and central memory T cells, but not in effector memory cells. Furthermore, a transcript associated with quiescence (*Klf3*) was differentially expressed in this subset. Additionally, this topic is enriched for CD4 lineage committing transcription factors (*Satb1*, *tcf1*, *lef1*). We thus labeled this topic as a mix of naïve and central memory T cells ( $T_{N/CM}$ ). Topic 12/14 was the most abundant topic representing ~ 50% of cells. This topic was characterized by transcripts related to cell cycle regulation (*jund*, *G0s2*), metabolism (*Arl4c*, *Ldlr*, *Igf1bp4*) and T cell trafficking regulation (*Pdlim4*). Thus, we assigned this topic to naïve CD4 T cells ( $T_N$ ).

Supplementary Figure 13

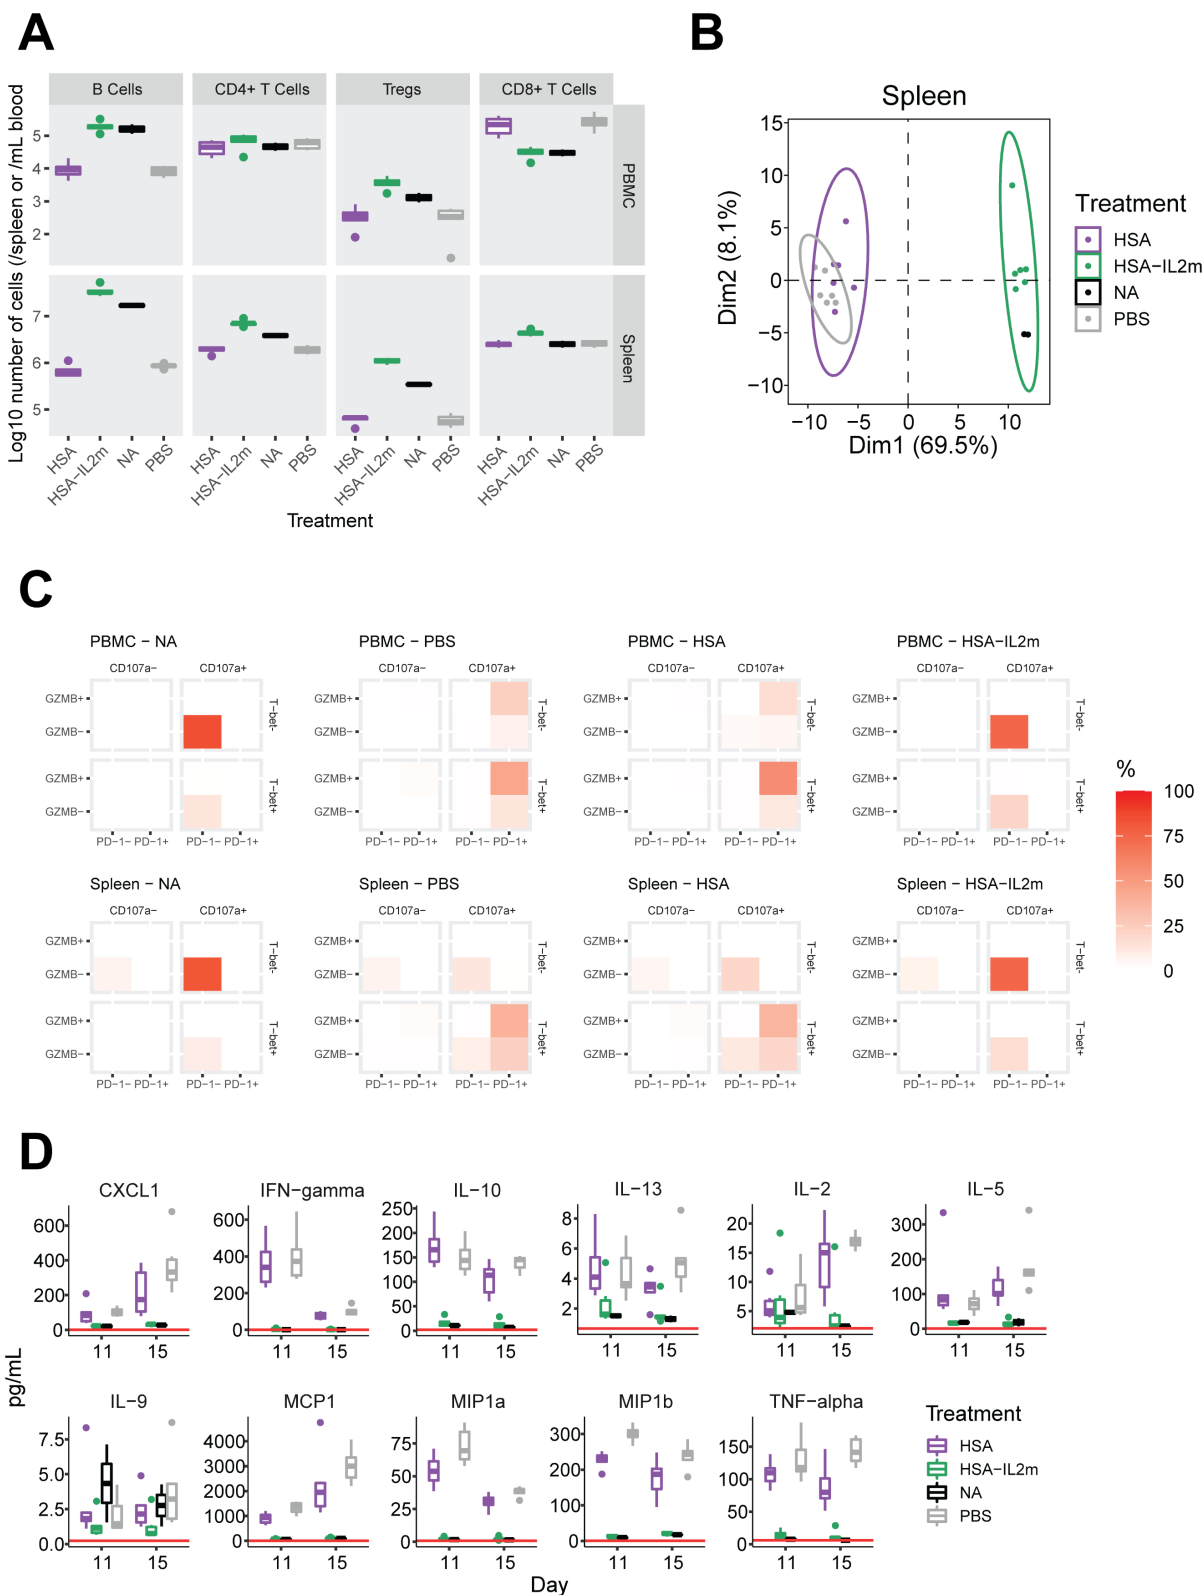

Acute GvHD model. A) Absolute number of B cells, CD4 T cells, CD8 T cells and Tregs in spleen and blood 14 days after cell transfer. B) Principal component projections of animal from blood and splenic flow cytometry data. C) phenotyping of CD8 T cells based on expression of surface PD-1 and intracellular CD107a, GZMB, and T-bet. D) Serum cytokines and chemokines 11 and 15 days after cell transfer (NA: n=2, all other groups: n=6). Box plots center is the median, bounds of box are 1<sup>st</sup> and 3<sup>rd</sup> quartile. Upper whisker is the largest value that is no greater than 1.5x the interquartile range plus the third quartile. Lower whisker is the smallest value that is no smaller than the first quartile minus 1.5x the interquartile range

Differential gene expression of spinal cord tissue on day 11 and day 19 (day 1 is the first immunization day) with *HSA* and *HSA-IL2m* treated animals compared to PBS (n = 4). Fold change associated P-values were adjusted using Benjamini-Yekutieli multiple comparison correction.

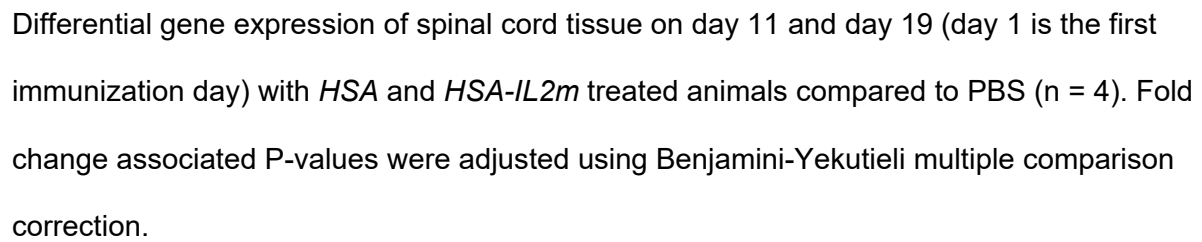

## Supplementary Figure 15

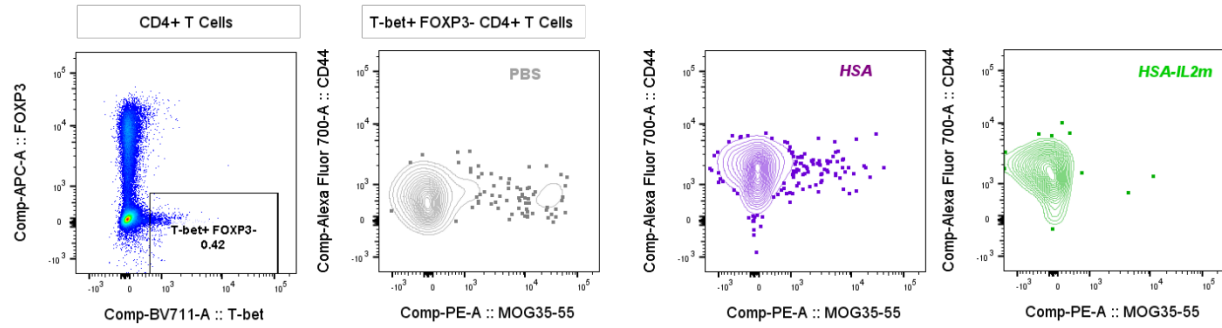

Representative staining for MOG35-55 Tetramer on CD4 T cells in inguinal lymph node samples, 10 days after immunization. CD4 T cells are gated for T-bet+ FOXP3- and then displayed with tetramer staining, shown with a representative sample from each group.

## Supplementary Figure 16

**A**

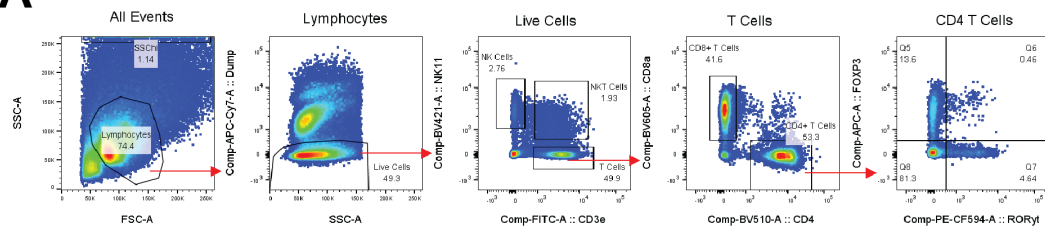

**B**

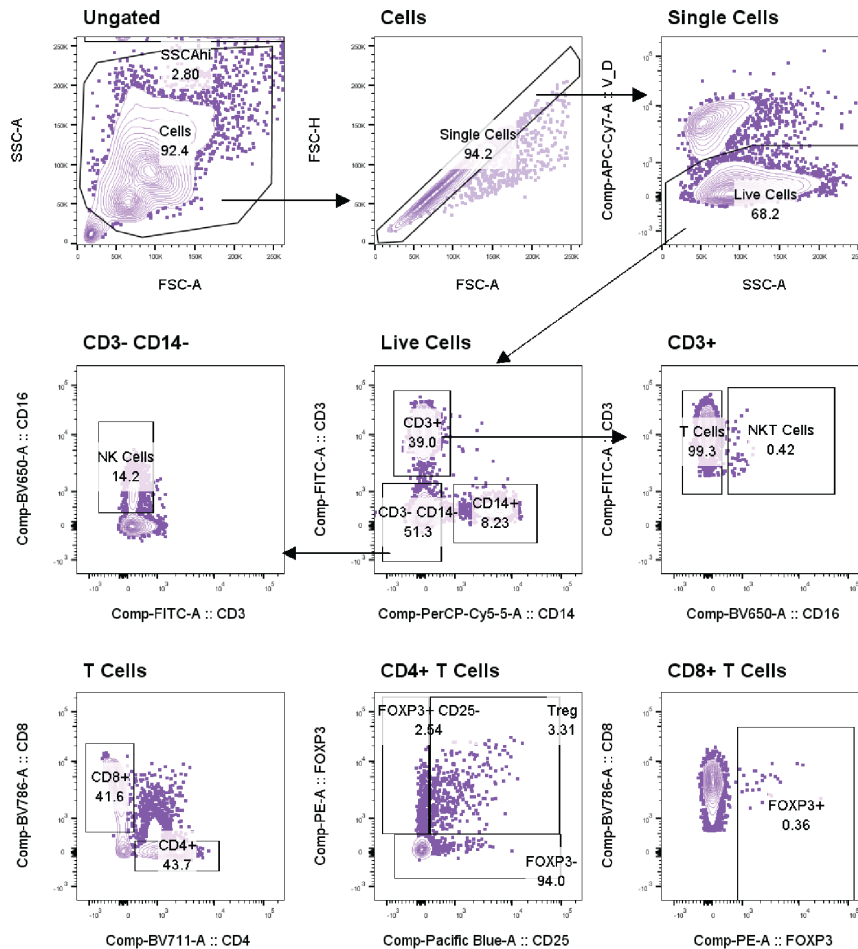

Illustrative flow cytometry gating of murine splenocytes and cynomolgus PBMCs. A)

Splenocytes from a representative EAE study. B) Representative sample from untreated

cynomolgus monkey PBMC.

## 2. Supplementary Tables

**Supplementary Table 1:** Antibody used in the in vitro STAT5 phosphorylation assays

Human PBMC:

| Target | Fluor.      | Vendor    | Catalog # | Clone           |
|--------|-------------|-----------|-----------|-----------------|
| CD3    | BV510       | Biolegend | 300448    | UCHT1           |
| CD4    | BV605       | Biolegend | 344646    | SK3             |
| CD45RA | AF488       | Biolegend | 304114    | HI100           |
| FoxP3  | AF647       | Biolegend | 320014    | 150D            |
| CD56   | PE-Cy7      | Biolegend | 318318    | HCD56           |
| CD8    | PerCP-Cy5.5 | Biolegend | 344710    | SK1             |
| pSTAT5 | PE          | BD        | 562077    | 47/Stat5(pY694) |

Cyno PBMC

| Target | Fluor. | Vendor    | Catalog # | Clone           |
|--------|--------|-----------|-----------|-----------------|
| CD4    | BV711  | Biolegend | 317440    | OKT4            |
| CD8    | BV786  | Biolegend | 344740    | SK1             |
| CD16   | BV650  | Biolegend | 302042    | 3G8             |
| CD45RA | AF488  | BD        | 555628    | 5H9             |
| pSTAT5 | PE     | BD        | 562077    | 47/Stat5(pY694) |
| FOXP3  | AF647  | Biolegend | 320014    | 150D            |

Rat splenocytes

| Target | Fluor. | Vendor    | Catalog # | Clone           |
|--------|--------|-----------|-----------|-----------------|
| CD32   | N/A    | BD        | 550271    |                 |
| CD4    | BV711  | BD        | 740723    | OX-35           |
| CD8a   | PerCP  | BD        | 201712    | OX-8            |
| CD161a | BV786  | BD        | 744054    | 10/78           |
| pSTAT5 | PE     | BD        | 562077    | 47/Stat5(pY694) |
| FOXP3  | AF647  | Biolegend | 320014    | 150D            |

Mouse splenocytes:

| Target   | Fluor. | Vendor    | Catalog # | Clone    |
|----------|--------|-----------|-----------|----------|
| Fc Block | N/A    | Biolegend | 101302    | 93       |
| CD3e     | AF488  | Biolegend | 100321    | 145-2C11 |
| CD4      | BV786  | Biolegend | 100453    | GK1.5    |

|        |       |           |        |                 |
|--------|-------|-----------|--------|-----------------|
| CD8a   | BV421 | Biolegend | 127643 | 1A8             |
| CD44   | BV510 | Biolegend | 103044 | IM7             |
| NK1.1  | BV605 | Biolegend | 108753 | PK136           |
| pSTAT5 | PE    | BD        | 562077 | 47/Stat5(pY694) |
| FOXP3  | AF647 | Biolegend | 320014 | 150D            |

All dilutions at 1:200, Fc block at 1:100.

**Supplementary Table 2:** Antibodies used for ex vivo flow cytometry studies

| Target                                          | Fluorophore | Dilution | Vendor       | Catalog #   | Clone        |
|-------------------------------------------------|-------------|----------|--------------|-------------|--------------|
| <i>Antibodies for mouse cell flow cytometry</i> |             |          |              |             |              |
| CD103                                           | BV786       | 1:100    | Biolegend    | #121439     | 2E7          |
| CD11b                                           | AF700       | 1:2000   | Biolegend    | #100753     | 53-6.7       |
| CD11b                                           | PerCP/Cy5.5 | 1:4000   | Biolegend    | #101228     | M1/70        |
| CD19                                            | APC/Cy7     | 1:2000   | Biolegend    | #115530     | 6D5          |
| CD19                                            | PE/Cy7      | 1:500    | Biolegend    | #100753     | 53-6.7       |
| CD25                                            | BV650       | 1:450    | Biolegend    | #102038     | PC61         |
| CD27                                            | BV421       | 1:1350   | Biolegend    | #124223     | 3A10         |
| CD3                                             | AF488       | 1:450    | Biolegend    | #100321     | 145-2C11     |
| CD3                                             | AF700       | 1:400    | Biolegend    | #100216     | 17A2         |
| CD39                                            | PE-Cy7      | 1:450    | Biolegend    | #143806     | DuHa59       |
| CD4                                             | BV510       | 1:2000   | Biolegend    | #100449     | GK1.5        |
| CD4                                             | BV605       | 1:2000   | Biolegend    | #100451     | GK1.5        |
| CD4                                             | BV711       | 1:2000   | Biolegend    | #100447     | GK1.5        |
| CD4                                             | BV785       | 1:1350   | Biolegend    | #100453     | GK1.5        |
| CD44                                            | AF488       | 1:2500   | Biolegend    | #103016     | IM7          |
| CD44                                            | AF700       | 1:1000   | Biolegend    | #103026     | IM7          |
| CD44                                            | BV510       | 1:1500   | Biolegend    | #103044     | IM7          |
| CD62L                                           | PE/Cy7      | 1:4000   | Biolegend    | #104418     | MEL-14       |
| CD73                                            | BV605       | 1:450    | Biolegend    | #127215     | TY/11.8      |
| CD8a                                            | APC/Cy7     | 1:2500   | Biolegend    | #100714     | 53-6.7       |
| CD8a                                            | BV605       | 1:2500   | Biolegend    | #100744     | 53-6.7       |
| CD8a                                            | PE/594      | 1:4000   | Biolegend    | #100762     | 53-6.7       |
| CD8a                                            | PerCP-Cy5.5 | 1:1000   | Biolegend    | #100734     | 53-6.7       |
| CTLA4                                           | PE-594      | 1:800    | Biolegend    | #106318     | UC10-4B9     |
| CXCR5                                           | Biotin      | 1:20     | Biolegend    | #145504     | L138D7       |
| FoxP3                                           | AF647       | 1:200    | Biolegend    | #320014     | 150D         |
| FoxP3                                           | PE          | 1:800    | Biolegend    | #126404     | MF-14        |
| GITR                                            | AF488       | 1:2500   | Biolegend    | #120211     | YGITR765     |
| GR-B                                            | AF647       | 1:320    | Biolegend    | #515406     | GB11         |
| H2-Kb                                           | BV421       | 1:900    | Biolegend    | #116513     | AF6-88.5     |
| H2-Kd                                           | PE          | 1:250    | eBiosciences | #17-5957-82 | SF1-1.1.1    |
| IA/IE                                           | AF700       | 1:2000   | Biolegend    | #107622     | M5/114.15.2  |
| IFN $\gamma$                                    | BV785       | 1:800    | Biolegend    | #505838     | XMG1.2       |
| IL-10                                           | PE-594      | 1:2000   | Biolegend    | #505034     | JES5-16E3    |
| IL-17A                                          | BV650       | 1:4050   | Biolegend    | #506930     | TC11-18H10.1 |
| Ki67                                            | PerCP/Cy5.5 | 1:800    | Biolegend    | #652424     | 16A8         |

|                                                 |             |        |                   |            |          |
|-------------------------------------------------|-------------|--------|-------------------|------------|----------|
| MOG35-55 Tetramer                               | PE          | 1:5    | MBL International | #TS-M704-1 | -        |
| NK1.1                                           | APC/Cy7     | 1:900  | Biolegend         | #108724    | PK136    |
| NK1.1                                           | BV421       | 1:900  | Biolegend         | #108741    | PK136    |
| NK1.1                                           | BV605       | 1:450  | Biolegend         | #108753    | PK136    |
| NKp46                                           | FITC        | 1:300  | Biolegend         | #137606    | 29A1.4   |
| PD-1                                            | BV786       | 1:200  | Biolegend         | #135225    | 29F.1A12 |
| PD-1                                            | BV711       | 1:1350 | Biolegend         | #135231    | 29F.1A12 |
| RORyt                                           | PE-594      | 1:800  | BD                | #562684    | Q31-378  |
| Streptavidin                                    | PE/Cy7      | 1:500  | Biolegend         | #          | N/A      |
| Tbet                                            | BV711       | 1:800  | Biolegend         | #644820    | 4B10     |
| TIGIT                                           | BV421       | 1:400  | Biolegend         | #142111    | 1G9      |
| <b>Antibodies for cynomolgus monkey studies</b> |             |        |                   |            |          |
| CD14                                            | PerCP/Cy5.5 | 1:200  | Biolegend         | #301824    | M5E2     |
| CD16                                            | BV650       | 1:400  | Biolegend         | #302042    | 3G8      |
| CD20                                            | PE/Cy7      | 1:5000 | Biolegend         | #302312    | 2H7      |
| CD25                                            | BV421       | 1:50   | Biolegend         | #356114    | M-A251   |
| CD27                                            | BV510       | 1:800  | Biolegend         | #302836    | O323     |
| CD3                                             | AF488       | 1:100  | BD                | #557705    | SP34-2   |
| CD3                                             | BV605       | 1:100  | BD                | #562994    | SP34-2   |
| CD39                                            | BV510       | 1:400  | Biolegend         | # 328219   | A1       |
| CD4                                             | BV711       | 1:400  | Biolegend         | #317440    | OKT4     |
| CD45RA                                          | APC         | 1:3200 | BD                | #561210    | 5H9      |
| CD45RA                                          | FITC        | 1:1600 | BD                | #555626    | 5H9      |
| CD45RO                                          | AF700       | 1:50   | Biolegend         | #304218    | UCHL1    |
| CD69                                            | BV605       | 1:100  | Biolegend         | #310938    | FN50     |
| CD8                                             | BV786       | 1:100  | Biolegend         | #344740    | SK1      |
| CTLA4                                           | PE/594      | 1:400  | Biolegend         | # 369616   | BNI3     |
| FoxP3                                           | PE          | 1:400  | Biolegend         | #320108    | 206D     |
| FoxP3                                           | AF647       | 1:200  | Biolegend         | #320014    | 150D     |
| GITR                                            | APC         | 1:50   | Biolegend         | # 311610   | 621      |
| GZMB                                            | PerCP/Cy5.5 | 1:800  | Biolegend         | #372212    | QA16A02  |
| HLA-DR                                          | BV510       | 1:150  | Biolegend         | #307646    | L243     |
| Ki67                                            | PE/Cy7      | 1:1600 | Biolegend         | # 350526   | Ki-67    |
| PD-1                                            | PE/Cy7      | 1:400  | Biolegend         | #329918    | EH12.2H7 |
| T-bet                                           | PE/594      | 1:3200 | Biolegend         | #644828    | 4B10     |
